# Supplementary material for: Small Airway Disease in Pulmonary Hypertension—Additional Diagnostic Value of Multiple Breath Washout and Impulse Oscillometry
Source: MDPI journal article supplement (doi:10.3390/jcm7120532), 2018-12-09
Supplement: s1 [file s1]

### Acceptability Criteria for MBW

- breathing pattern
  - stable tidal volume, no hyperventilation, no hypoventilation
  - no coughing
  - assessed clinically and in-silico
- variability
  - within 10% from the median FRC / LCI across triplicate tests
  - careful examination for technical issues if larger, but within 25%
  - rejection if larger > 25%
- no leak
  - equilibration between inspiratory and expiratory SF<sub>6</sub> concentrations during wash-in
  - no sudden drop in inspiratory SF<sub>6</sub> concentration during wash-in
- test termination
  - at least three consecutive breaths with end tidal SF<sub>6</sub> concentrations <1/40th of starting value
- test conduction
  - no excessive swallowing (clinical assessment)
  - sufficient interval between tests
 

(twice the wash-out time or measurement of resituated gas concentrations)

### Parameters for propensity score matching

- non-healthy controls (previous collective, n=367)
  - age, gender, weight, height
  - COPD, sarcoidosis, asthma, pulmonary fibrosis
  - FEV<sub>1</sub>/VC, RV/TLC, TLCO/VA
- healthy controls (previous collective, n=34)
  - age, gender, weight, height

**Table S1.** Reversibility testing.

|                                | PH ( <i>n</i> = 25) |     | Non-Healthy Controls ( <i>n</i> = 25) |     | <i>p</i> -value <sup>#</sup> |
|--------------------------------|---------------------|-----|---------------------------------------|-----|------------------------------|
|                                | <i>n</i>            | %   | <i>n</i>                              | %   |                              |
| <b>test count</b>              | 12                  | 100 | 9                                     | 100 | 0.57                         |
| <b>Positive</b>                |                     |     |                                       |     |                              |
| <b>spirometry</b> <sup>§</sup> | 1                   | 8   | 1                                     | 11  | >0.9                         |
| <b>body</b> <sup>†</sup>       | 2                   | 17  | 3                                     | 33  | 0.71                         |
| <b>IOS</b> <sup>‡</sup>        | 4                   | 33  | 1                                     | 11  | 0.60                         |

<sup>§</sup> FEV<sub>1</sub>: >12% and 200 ml increase according to [32], <sup>†</sup> RV: >20% decrease according to [33], <sup>‡</sup> AX: >50% decrease according to [34]. <sup>#</sup> Chi-squared test. \* Statistically significant *p* < 0.05.

**Table S2.** Number of successful MBW measurements.

| PH ( <i>n</i> = 25)                       |          |    | Healthy Controls ( <i>n</i> = 25) |    |                              | Non-Healthy Controls ( <i>n</i> = 25) |    |                              |
|-------------------------------------------|----------|----|-----------------------------------|----|------------------------------|---------------------------------------|----|------------------------------|
|                                           | <i>n</i> | %  | <i>n</i>                          | %  | <i>p</i> -Value <sup>#</sup> | <i>n</i>                              | %  | <i>p</i> -Value <sup>#</sup> |
| <i>LCI</i>                                |          |    |                                   |    |                              |                                       |    |                              |
| 0                                         | 0        | 0  | 0                                 | 0  | >0.9                         | 0                                     | 0  | >0.9                         |
| 1                                         | 0        | 0  | 0                                 | 0  |                              | 0                                     | 0  |                              |
| 2                                         | 6        | 24 | 5                                 | 20 |                              | 6                                     | 24 |                              |
| 3                                         | 19       | 76 | 20                                | 80 |                              | 19                                    | 76 |                              |
| <i>S<sub>acin</sub>, S<sub>cond</sub></i> |          |    |                                   |    |                              |                                       |    |                              |
| 0                                         | 4        | 16 | 4                                 | 16 | 0.72                         | 8                                     | 32 | 0.38                         |
| 1                                         | 3        | 12 | 6                                 | 24 |                              | 3                                     | 12 |                              |
| 2                                         | 10       | 40 | 9                                 | 36 |                              | 5                                     | 20 |                              |
| 3                                         | 8        | 32 | 6                                 | 24 |                              | 9                                     | 36 |                              |

LCI: lung clearance index, *S<sub>acin</sub>*: acinar ventilation heterogeneity, *S<sub>cond</sub>*: conductive ventilation heterogeneity. <sup>#</sup>Chi-squared test as compared to the PH group. \* Statistically significant *p* < 0.05.

**Table S3.** Comorbidities (PH group, *n* = 25).

|                             | <i>n</i> | %  |
|-----------------------------|----------|----|
| arterial hypertension       | 17       | 68 |
| atrial fibrillation         | 14       | 56 |
| coronary heart disease      | 11       | 44 |
| diabetes mellitus (type II) | 7        | 28 |
| COPD                        | 7        | 28 |
| sarcoidosis                 | 5        | 20 |
| bronchial asthma            | 2        | 8  |
| fibrosis                    | 2        | 8  |

COPD: chronic obstructive pulmonary disease.

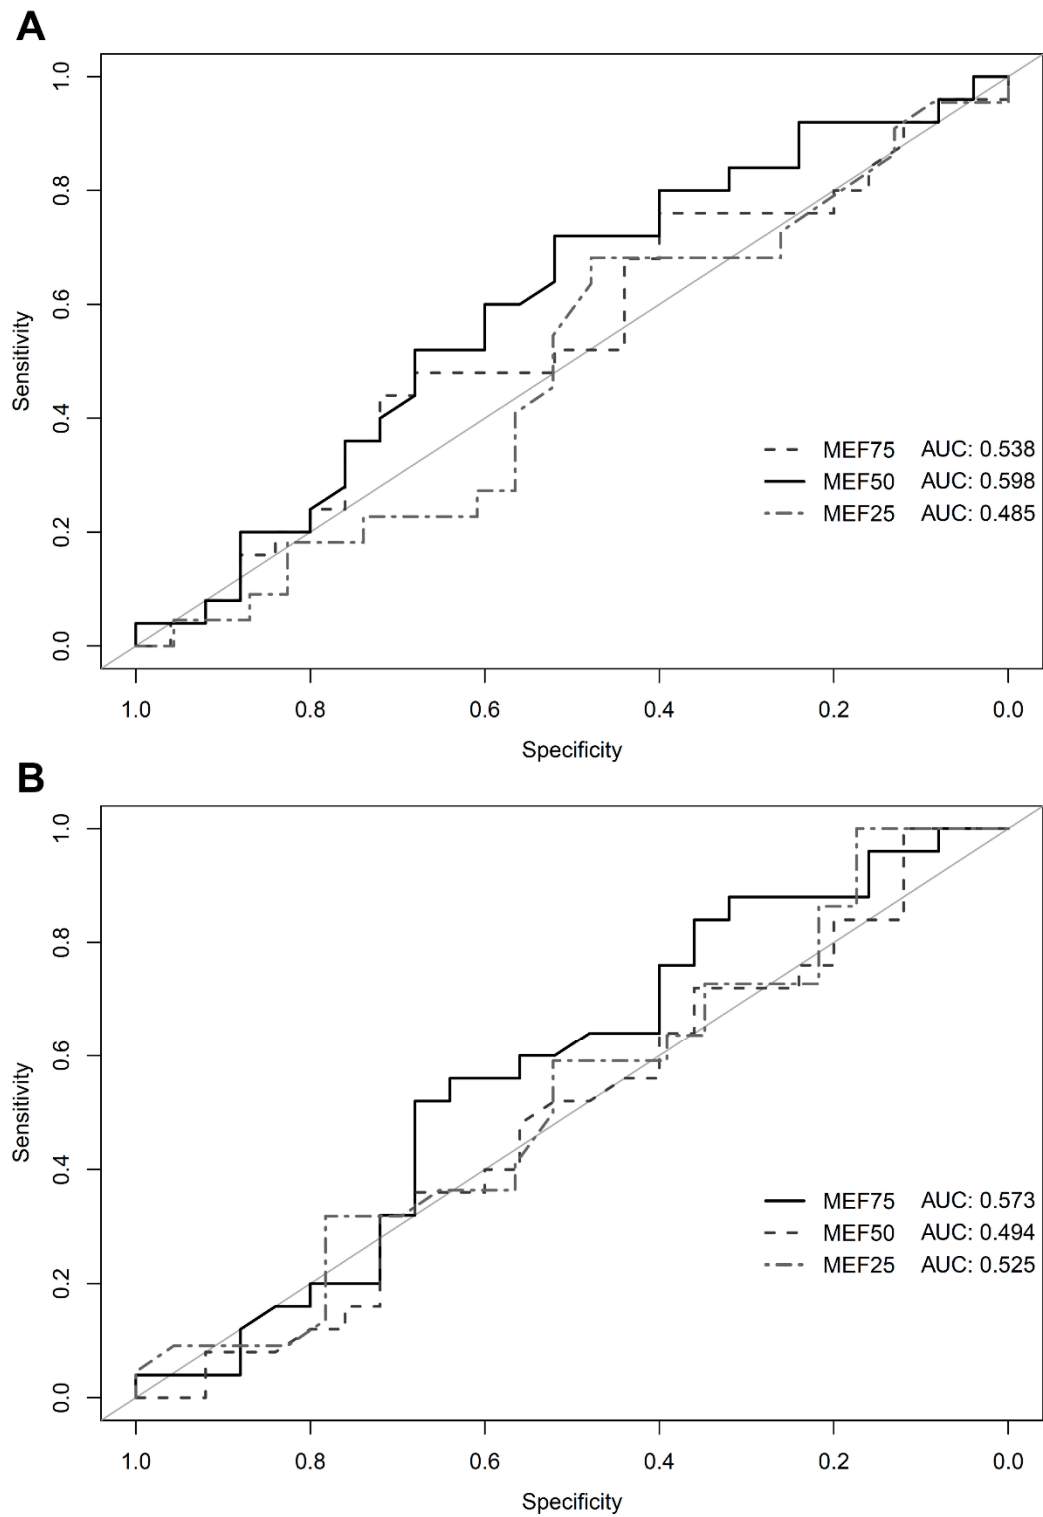

**Figure S1.** Diagnostic performance: ROC analysis for maximal expiratory flow (MEF) at 75, 50 and 25% of vital capacity (VC). **A:** patients with PH vs. healthy controls. **B:** patients with PH vs. non-healthy controls.
